# Supplementary material for: Using Test Positivity and Reported Case Rates to Estimate State-Level COVID-19 Prevalence and Seroprevalence in the United States
Source: bioRxiv or medRxiv preprint supplement (doi:10.1101/2020.10.07.20208504), 2020-12-26

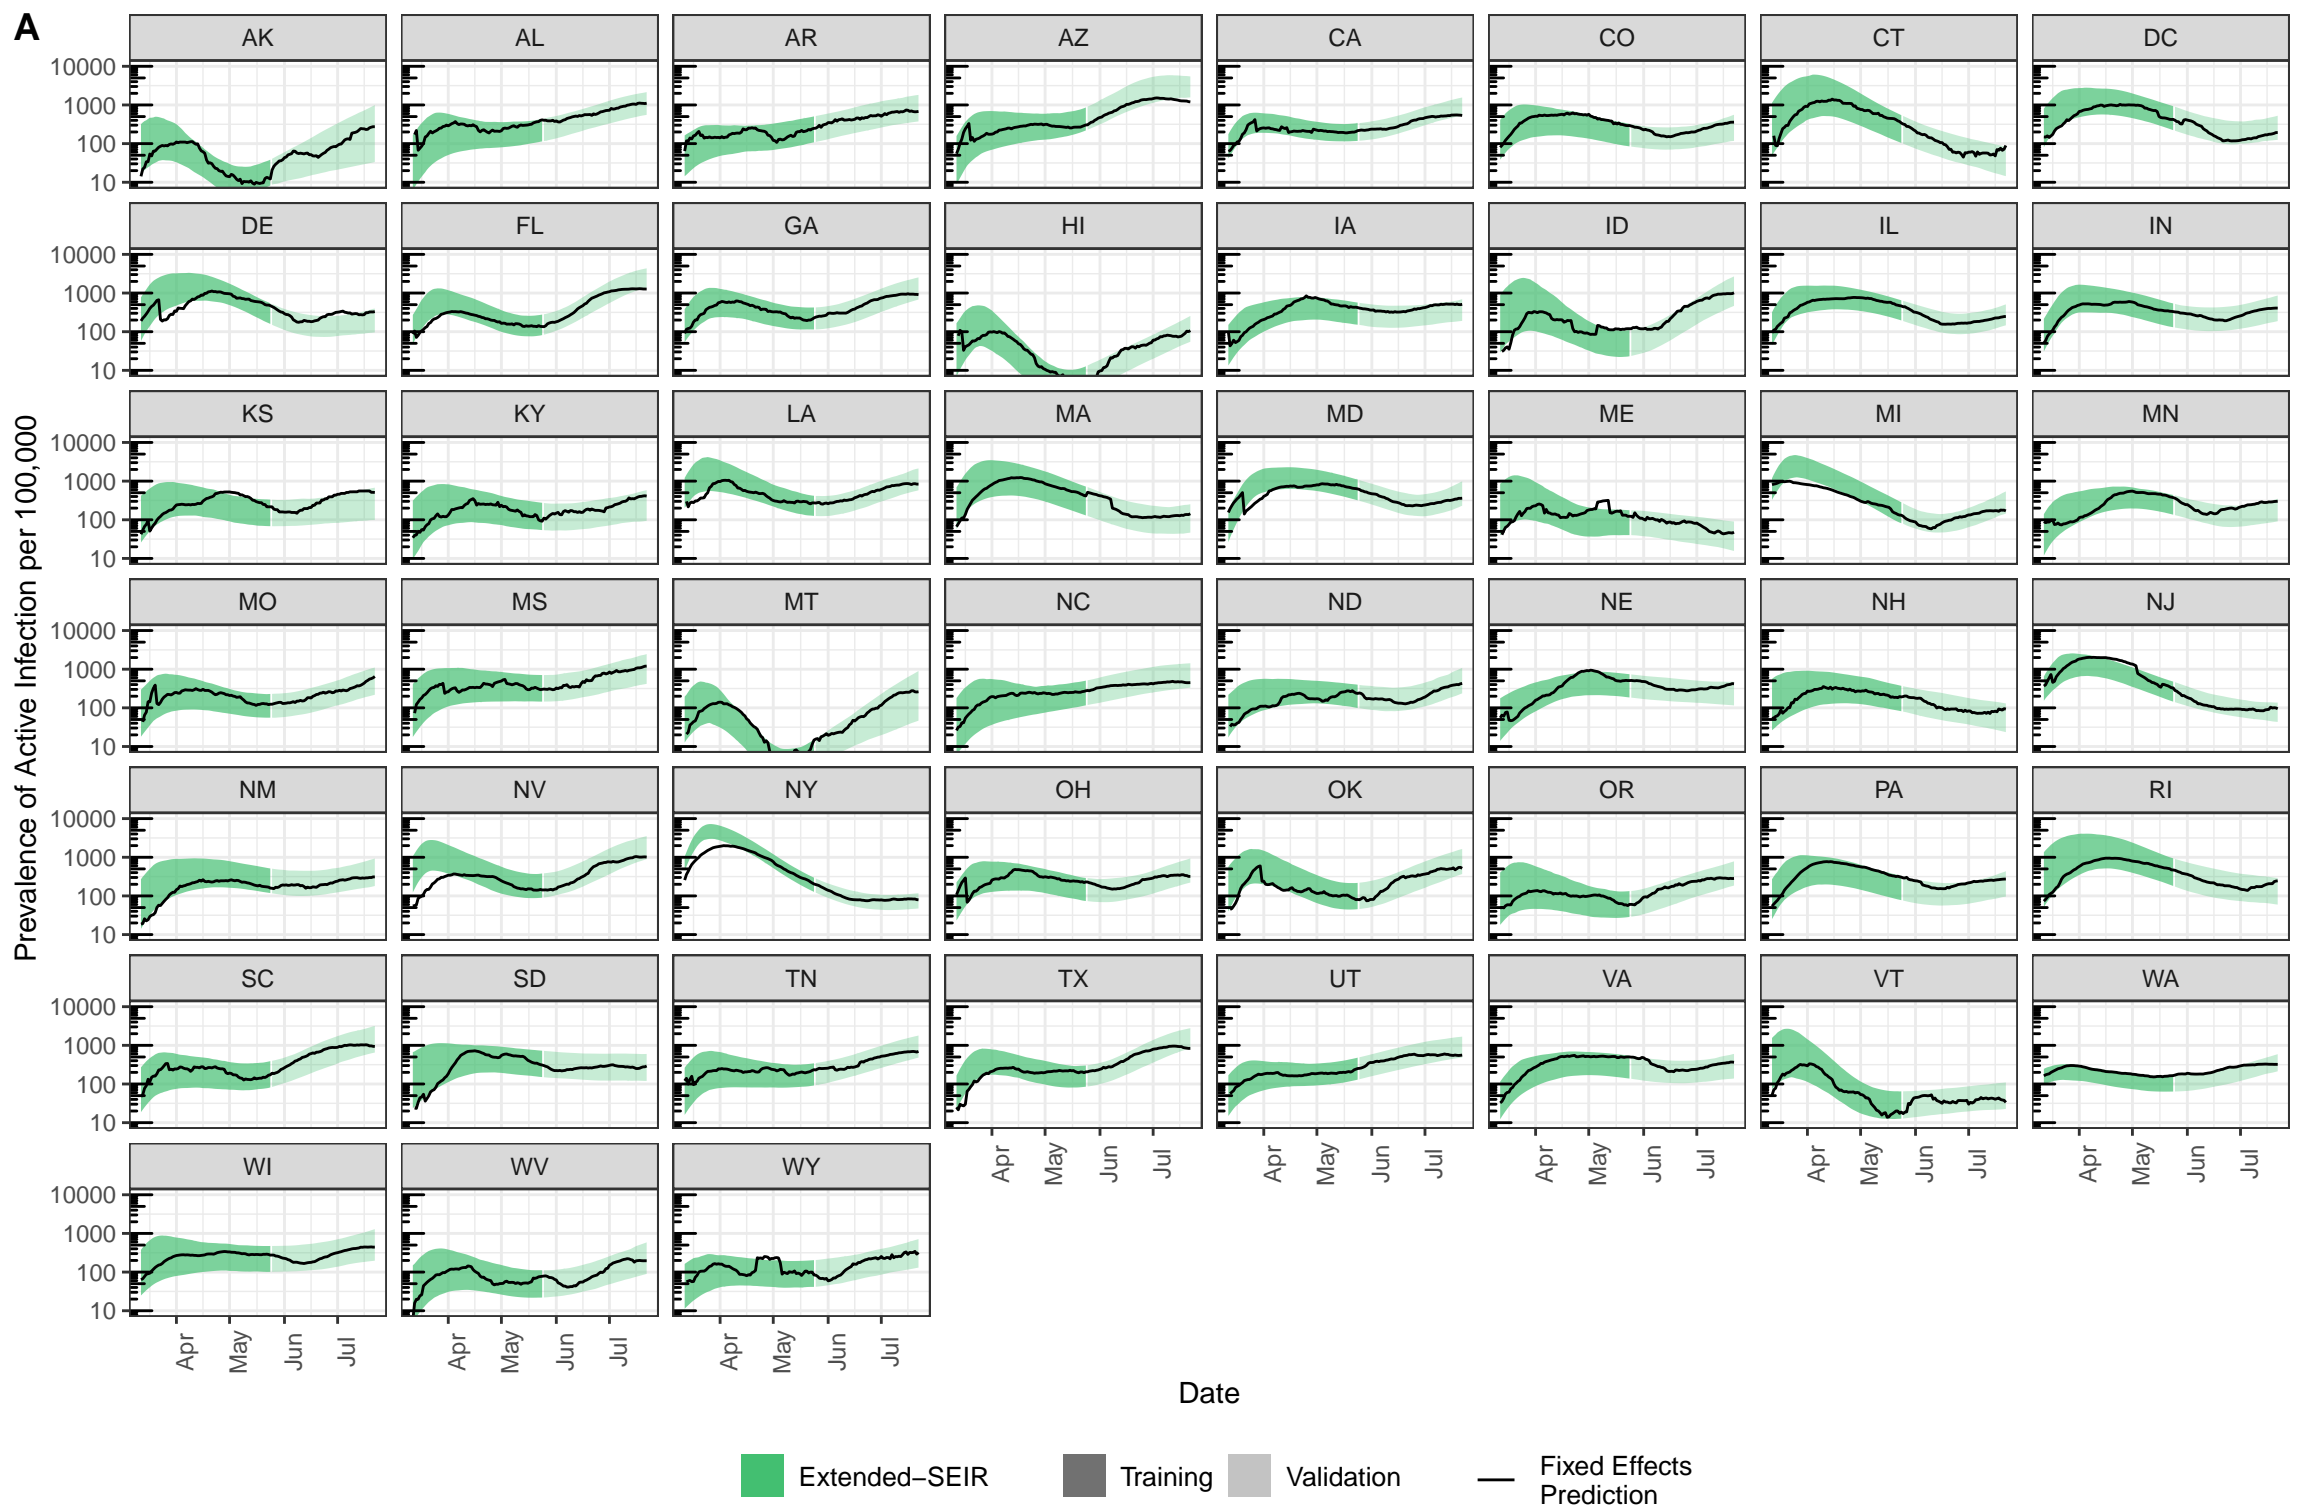

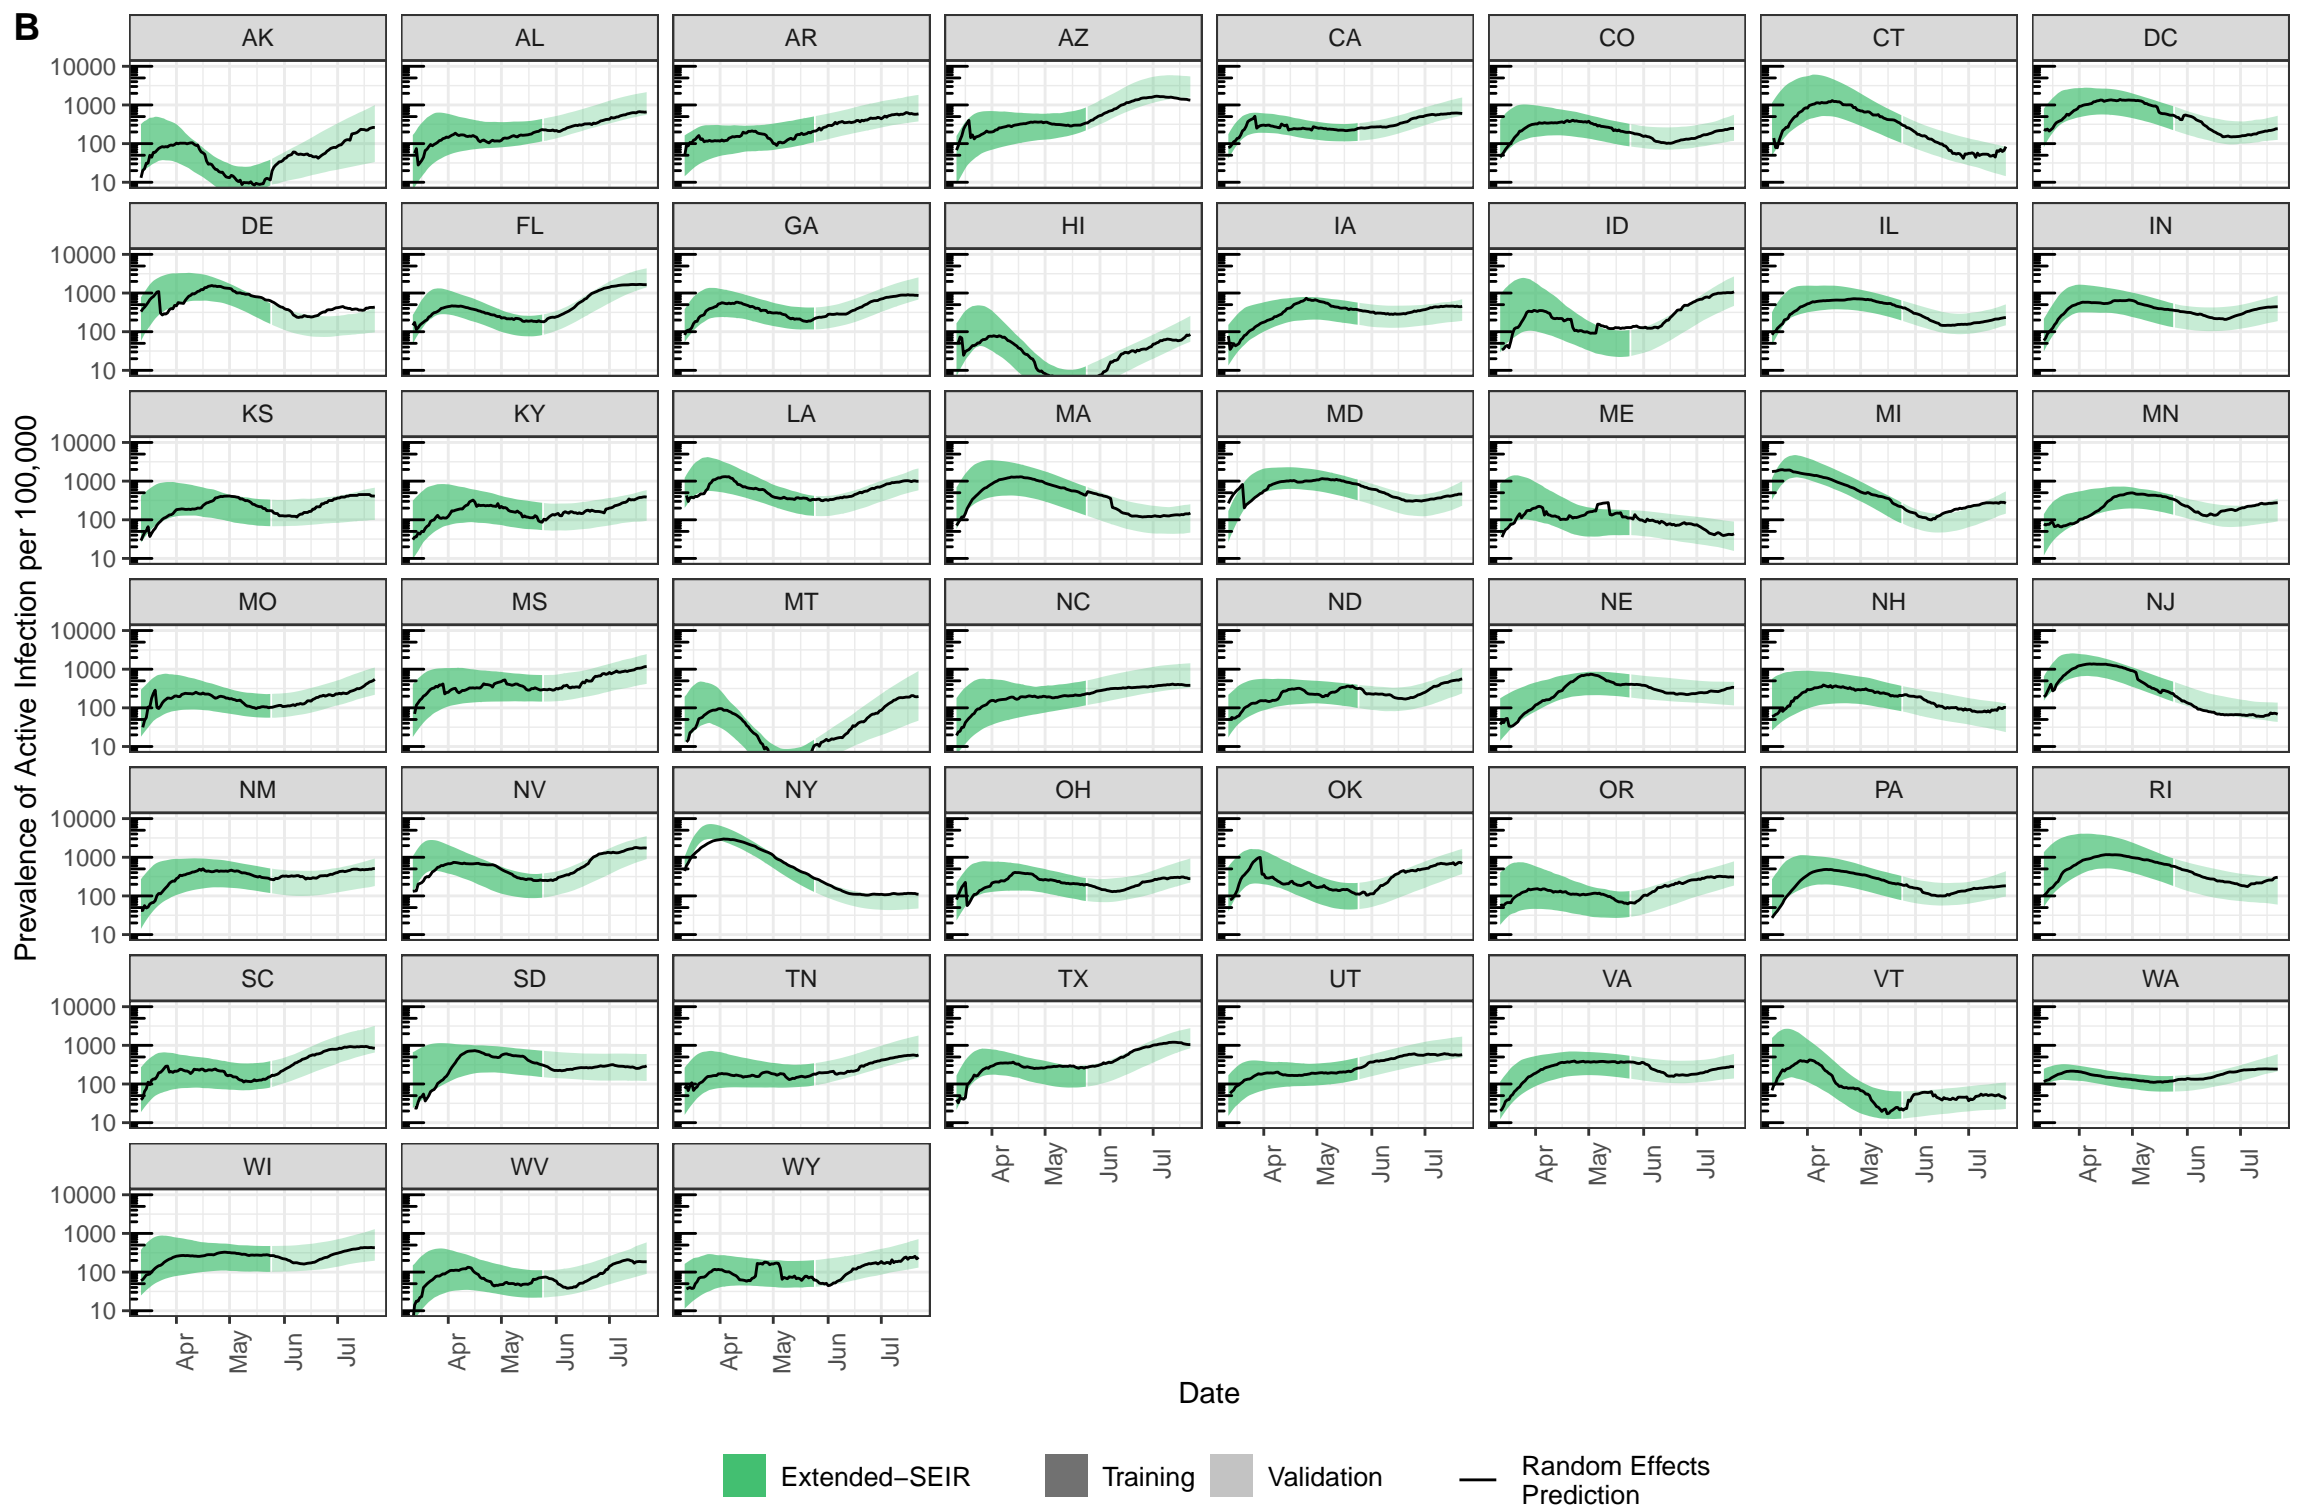

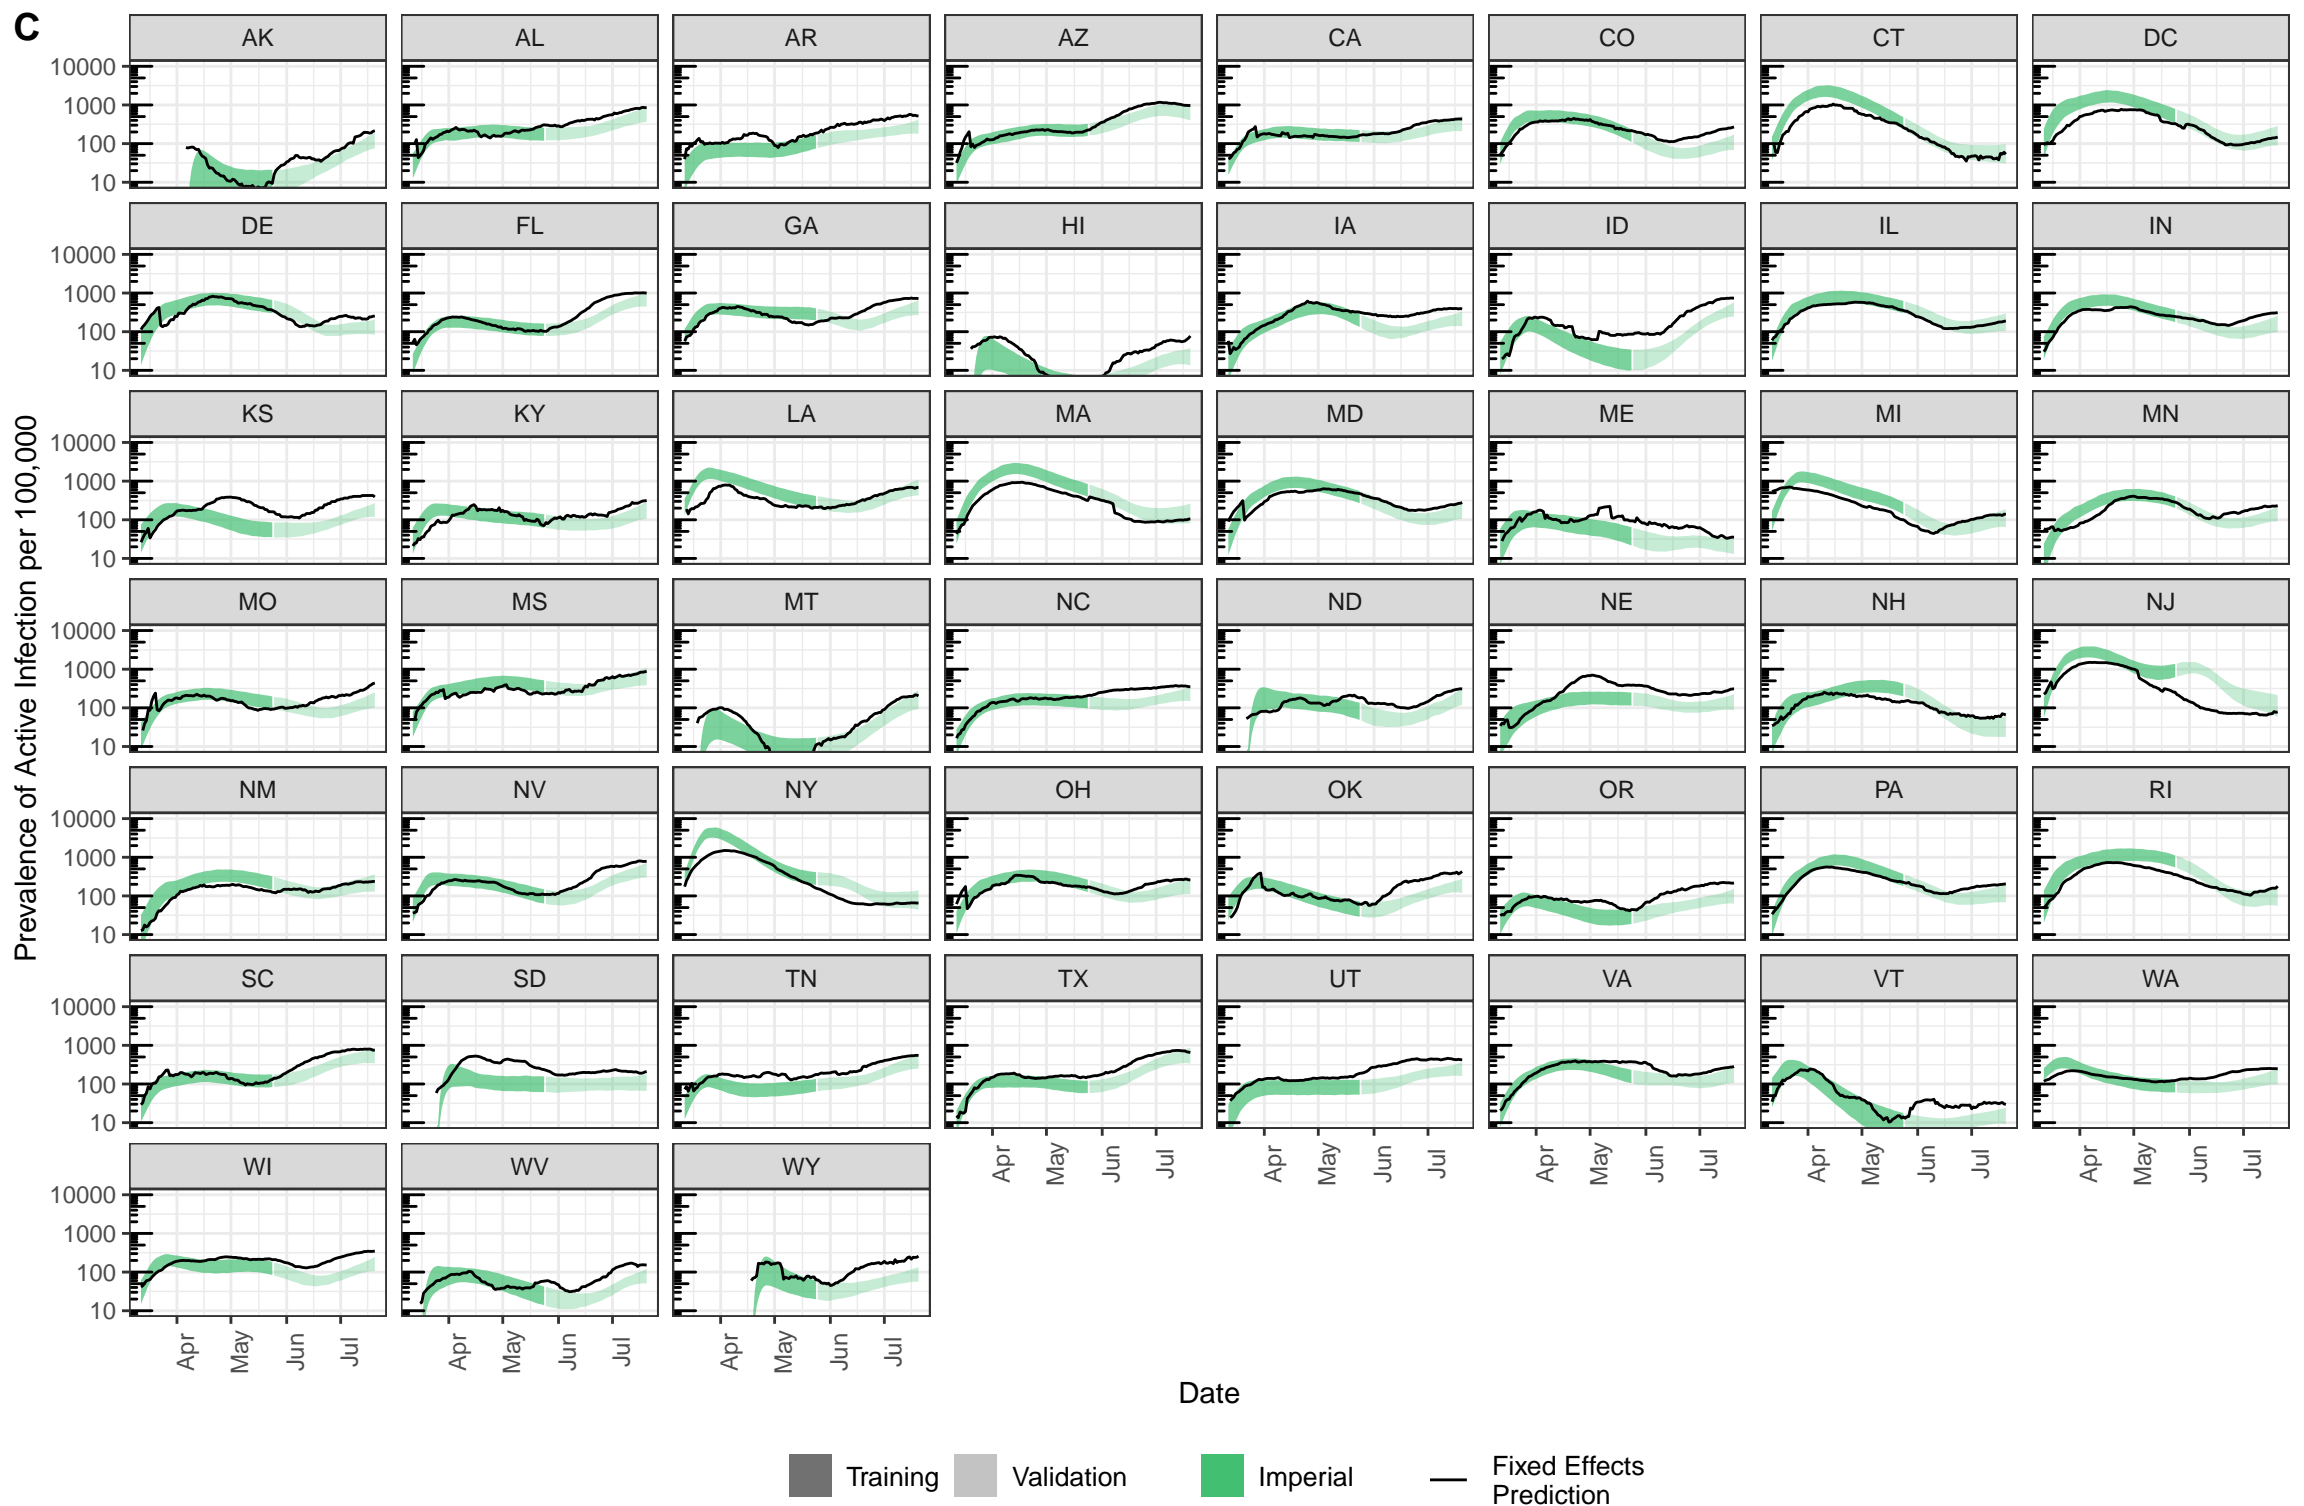

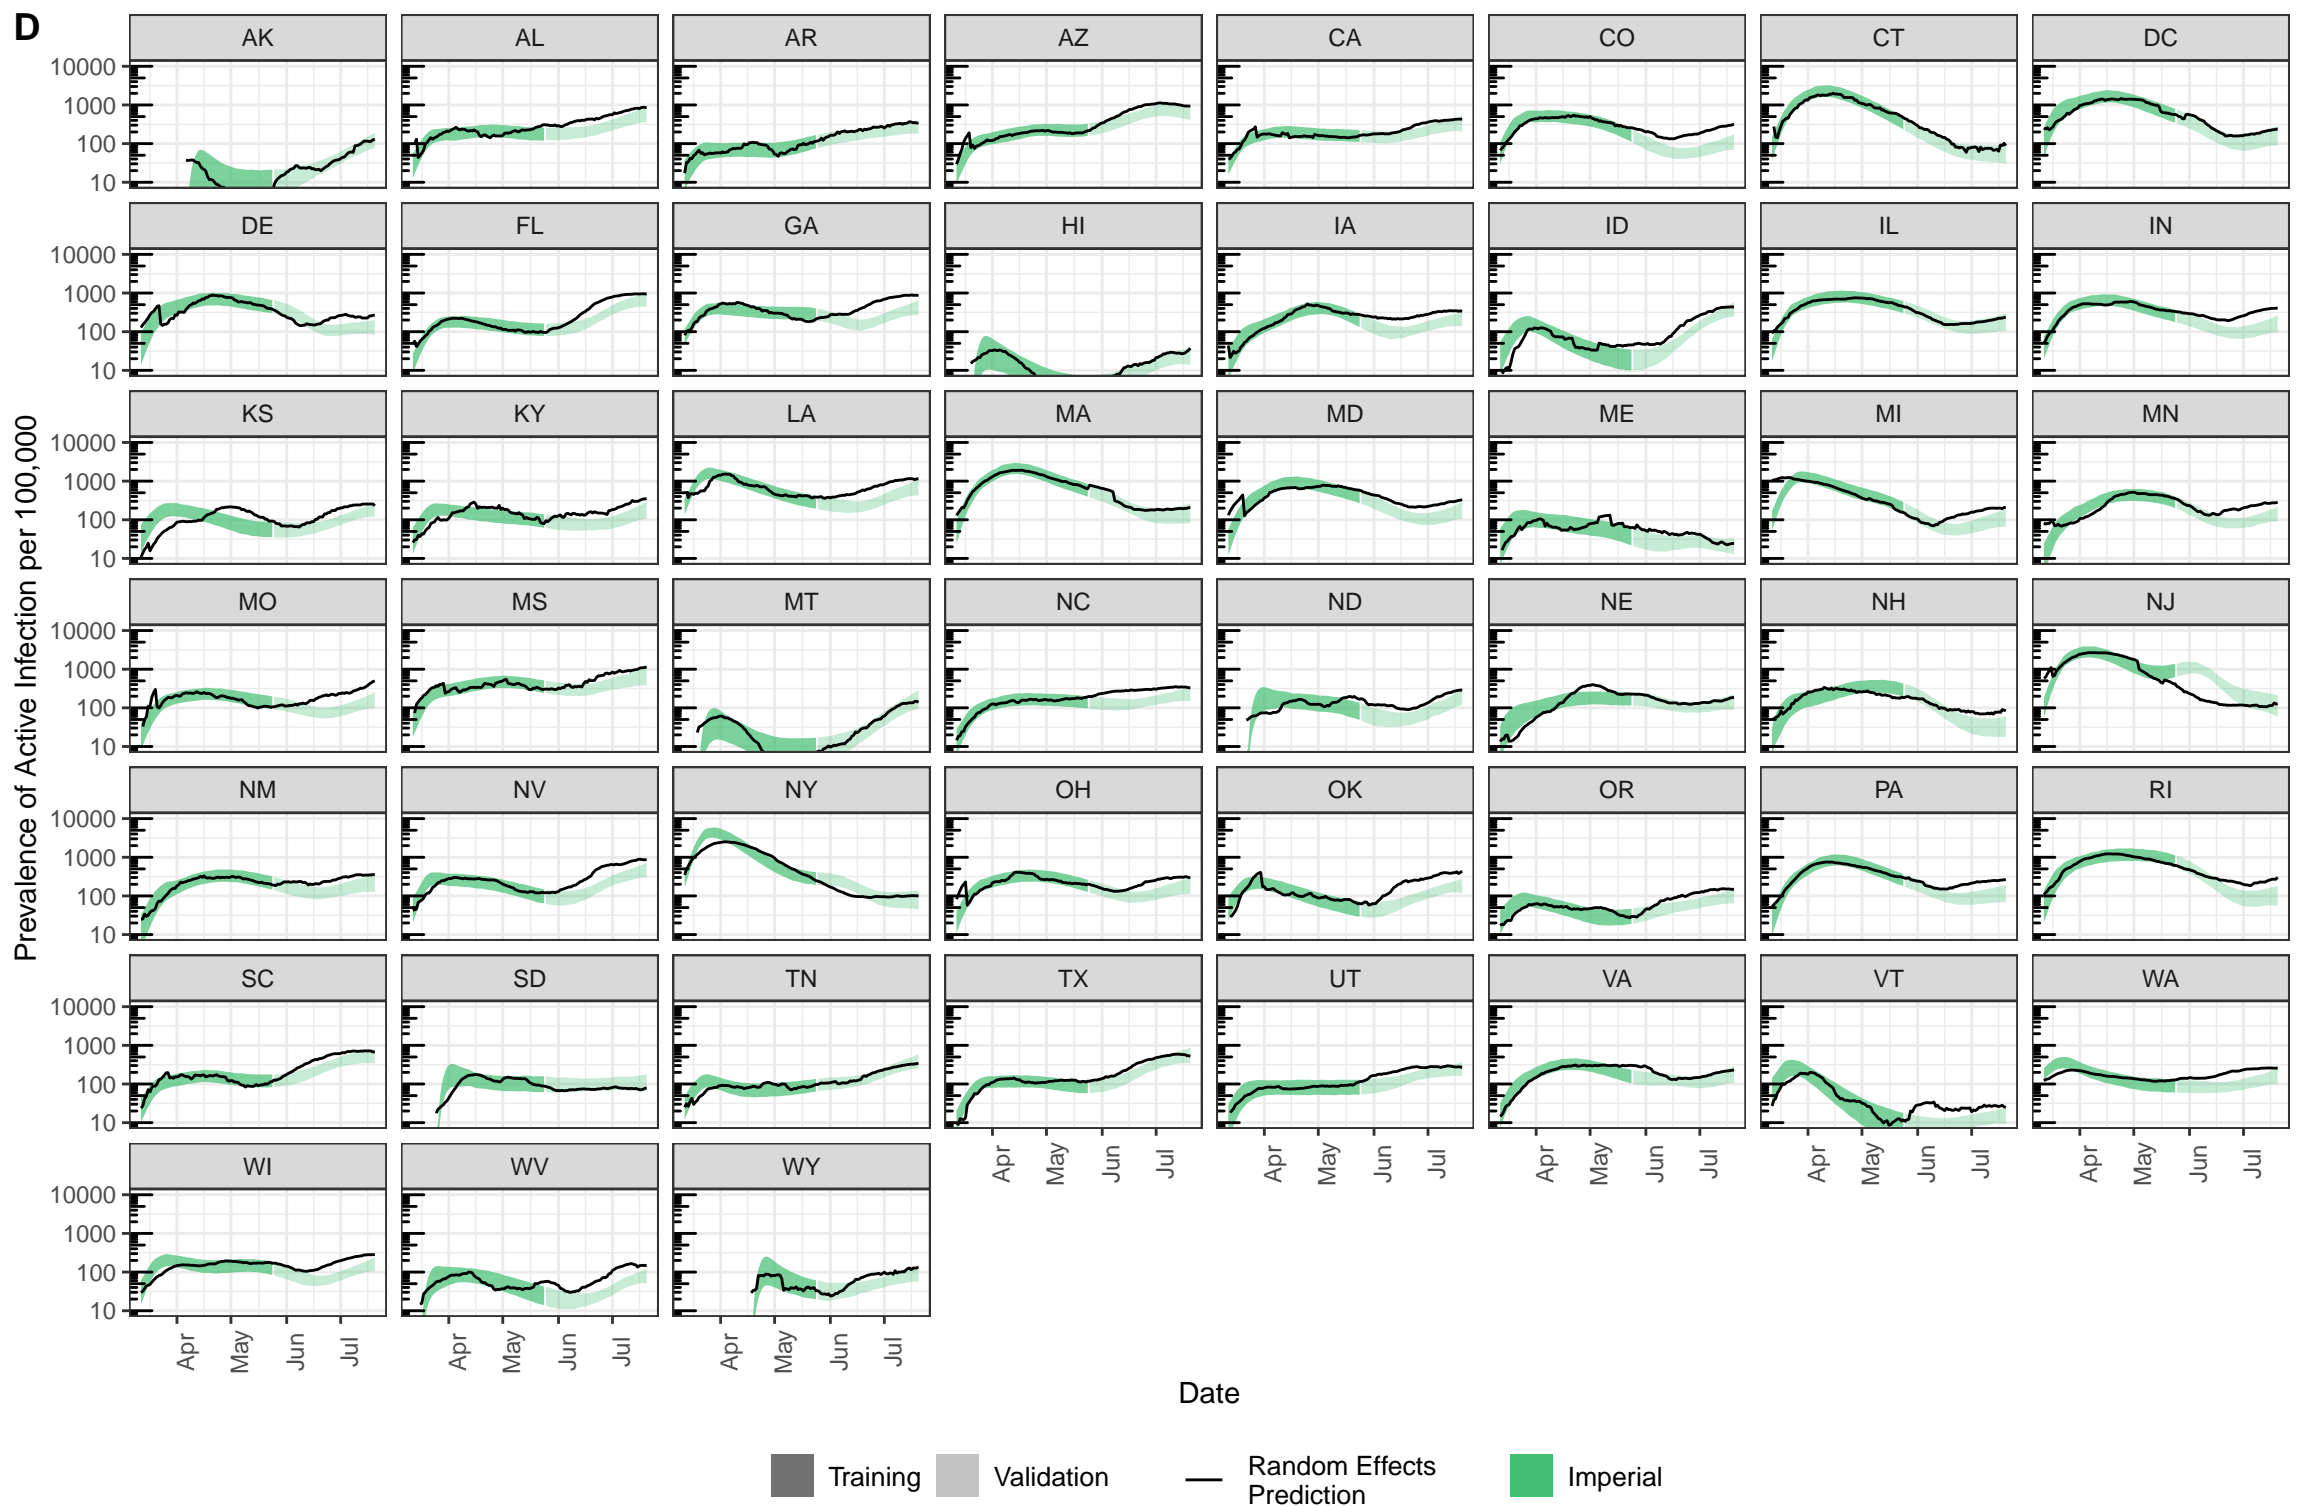

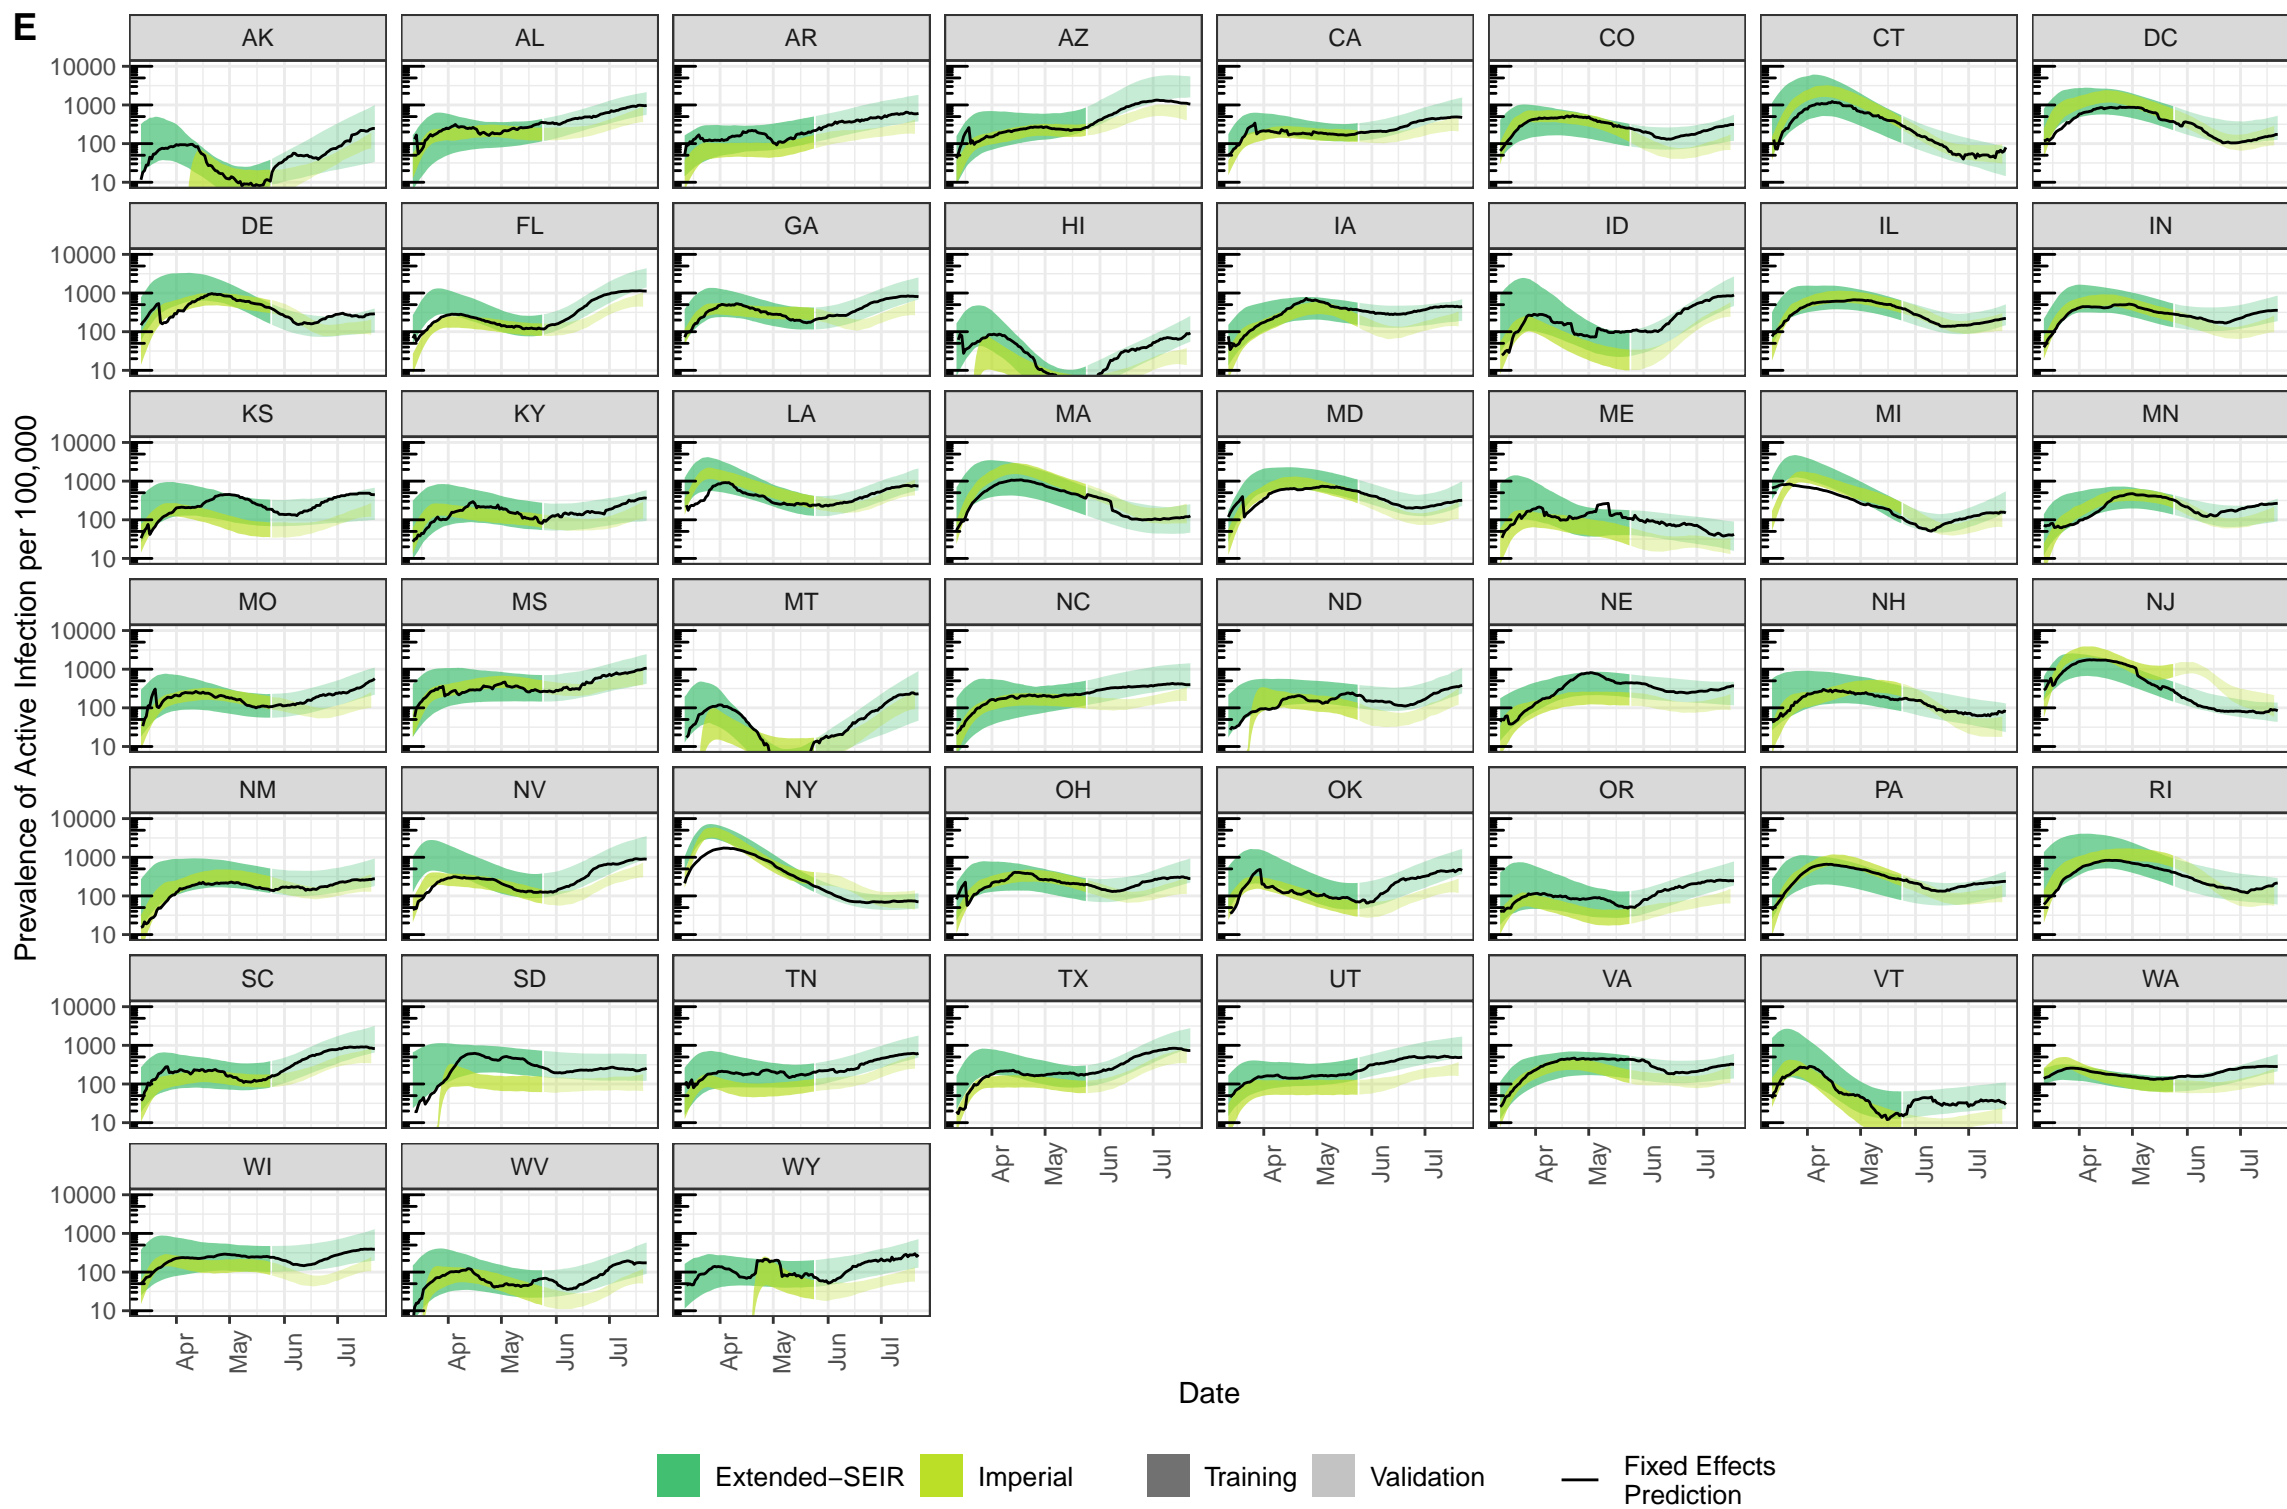

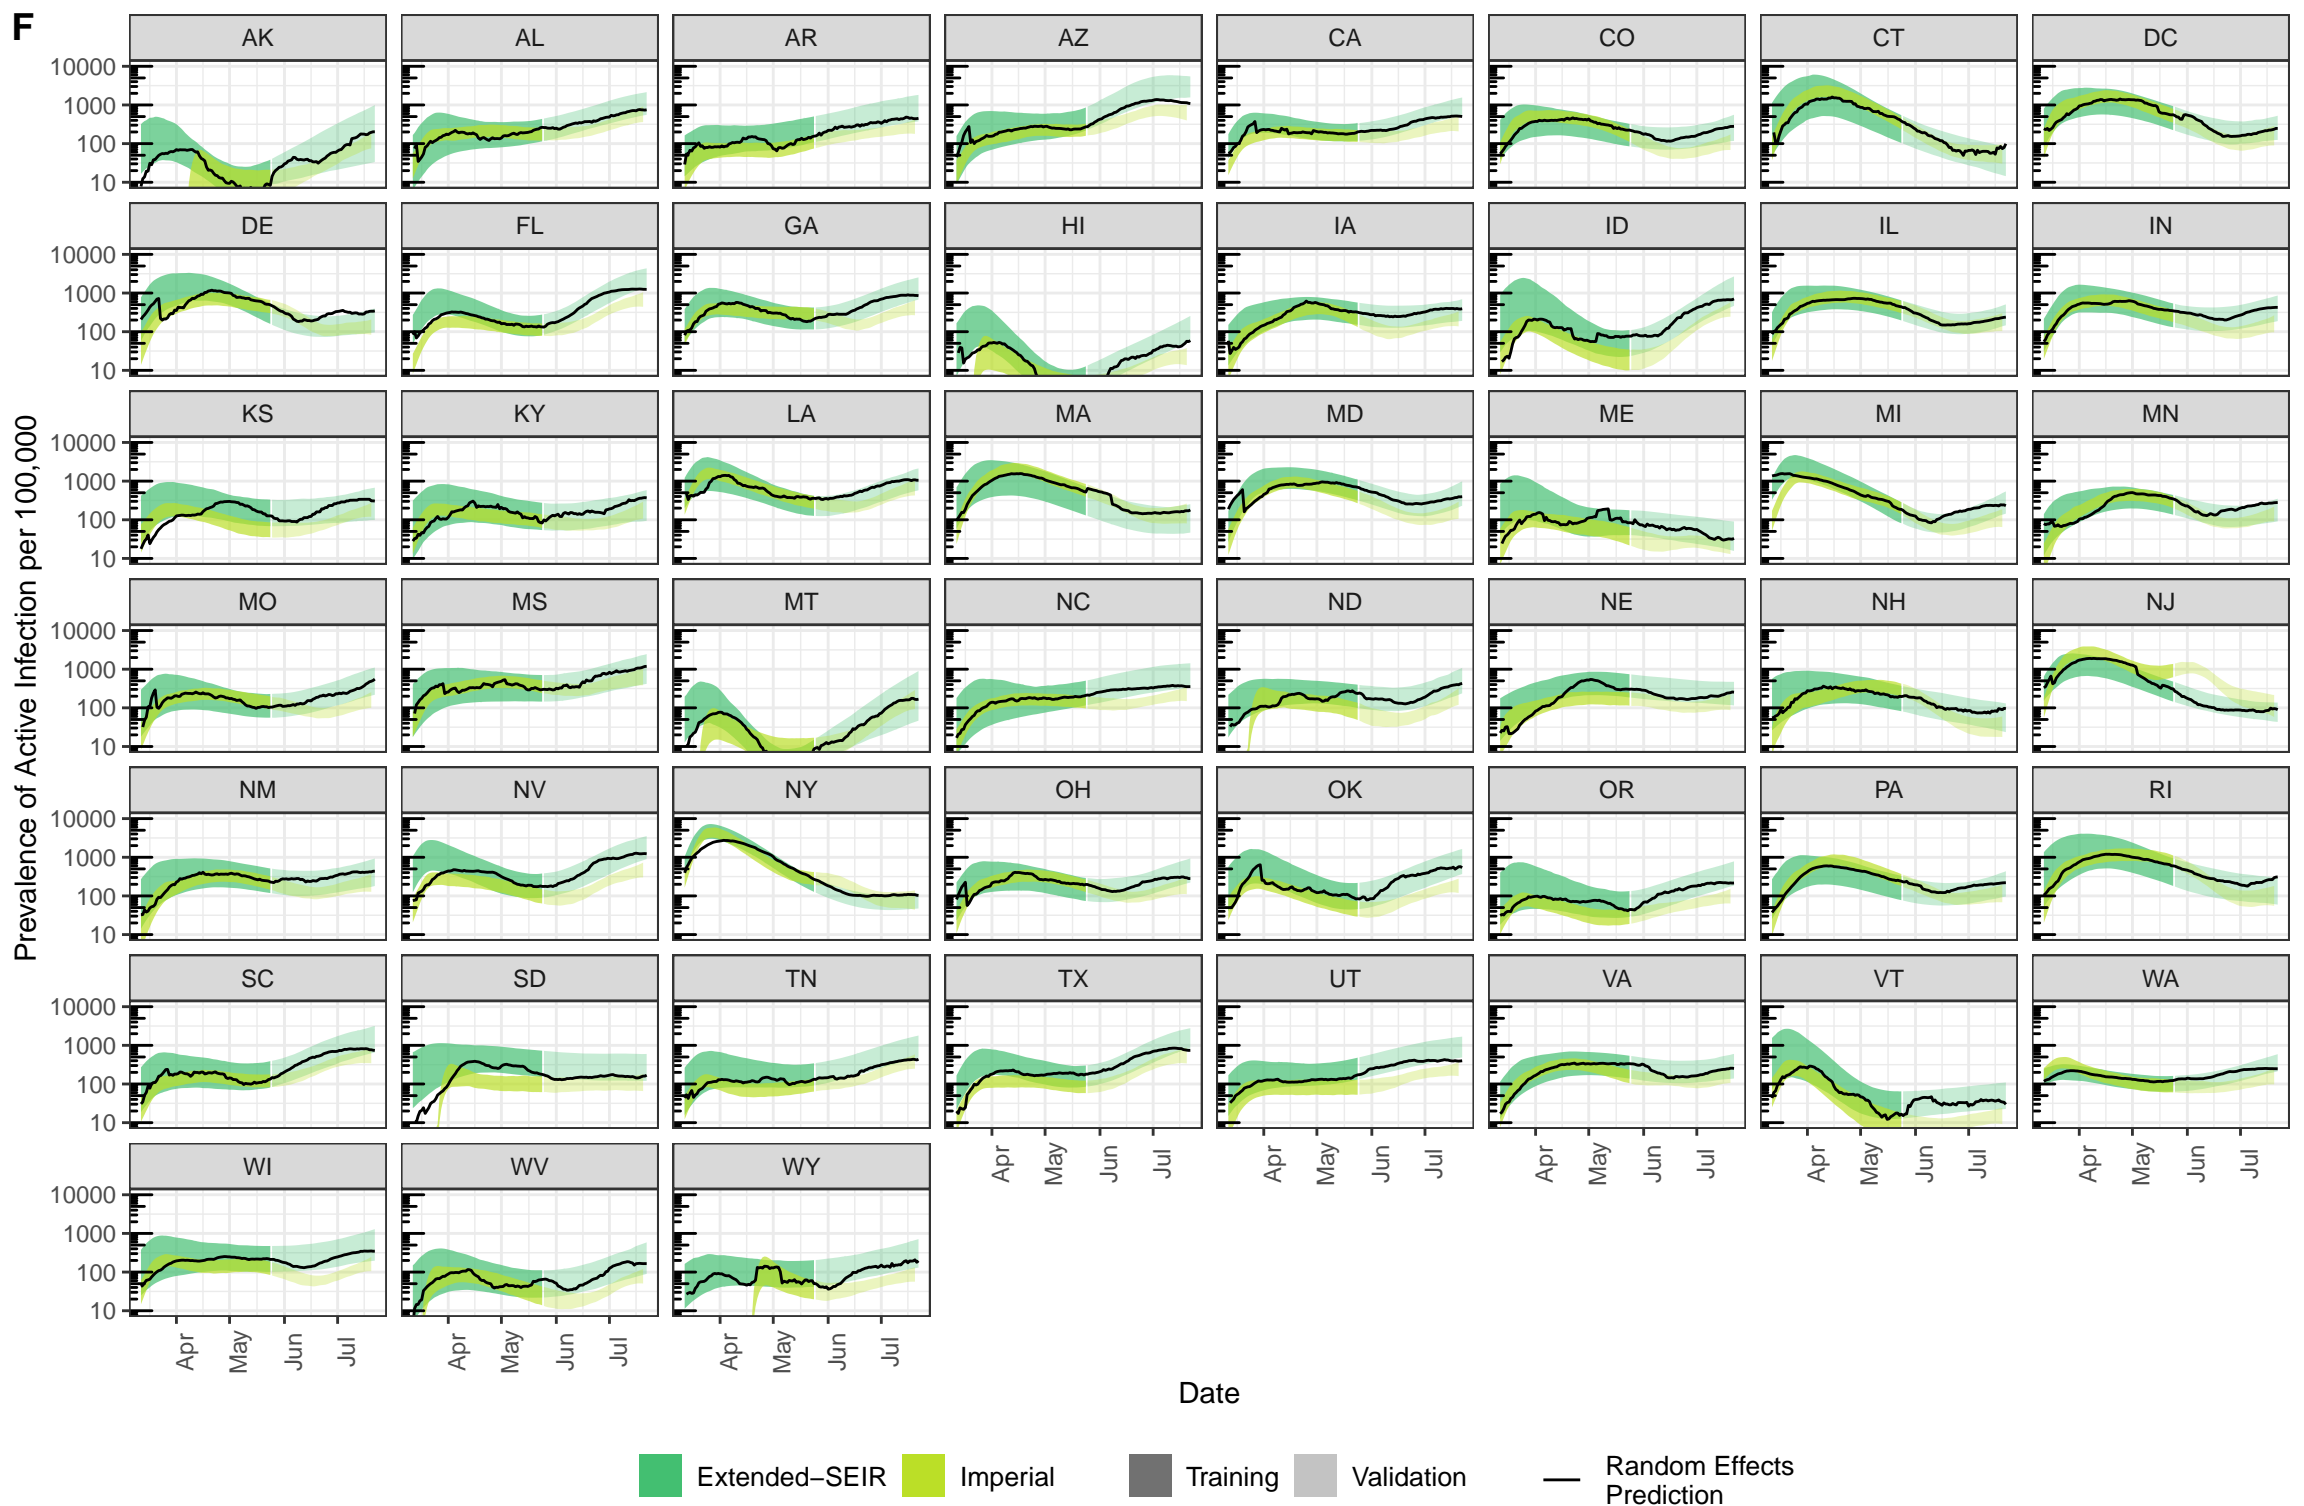

Supplement: Supplementary file [file media-2.pdf]
